# Supplementary material for: Functional movement disorder gender, age and phenotype study: a systematic review and individual patient meta-analysis of 4905 cases
Source: HighWire-hosted journal article supplement (doi:10.1136/jnnp-2021-328462), 2022-02-25
Supplement: jnnp-2021-328462supp001_data_supplement.pdf [file jnnp-2021-328462supp001_data_supplement.pdf]

## SUPPLEMENTARY METHODS

### Unpublished data sharing

Unpublished data was collected from experts in the field via an initial invitation to the Movement Disorders Society FMD Study Group. Invitations were also extended to any collaborators suggested by study group members. This formed the basis for the FMD GAP Study Group. We emailed invitation packages including the study protocol, data sharing instructions and a standardized form for data sharing. We requested original, non-published patient data from personal or research databases but also accepted data collected from retrospective chart reviews at the donating institution. All data provided was required to be de-identified prior to sharing. Contributors were required to confirm that their data was collected from participants who provided informed consent. Contributors were required to comply with their own institutional research ethics boards. An institutional data transfer agreement was arranged in most cases. Authors were asked to confirm that the diagnosis of FMD was made clinically using established criteria.<sup>(1,2)</sup> All patients were all diagnosed by neurologists with movement disorder training and all cases were drawn from neurological settings. We did not request the time frame for data collection nor if cases were consecutive as we felt these requirements would have substantially reduced the size of the dataset.

Our instructions outlined that we were collecting 3 variables for each patient: gender, age at FMD onset, and FMD phenotype, if available. We asked that transgender patients be classified according to “gender at birth.” We specified that the age of FMD onset is defined as the age (in years) when the patient first developed their FMD chief complaint. It was emphasized that age at onset – and not the age at presentation for the initial evaluation – was of interest. We accepted as a proxy measure for age of onset the age at FMD diagnosis minus FMD symptom duration. Accurate diagnosis and age of onset were left to the judgement of the clinicians. In this IPD meta-analysis of a minimal demographic dataset, missing data was not a concern nor was reporting bias. No other variables were sought.

### Phenotypic characterization

We requested the dominant phenotype at the onset of FMD and that it be labelled under one of the following: tremor, dystonia, gait, weakness, jerks/myoclonus, facial symptoms, parkinsonism, other, mixed and unknown/not documented. For patients with multiple presentations over time, we specified that the phenotype at their initial evaluation was to be included. For the “other” category, we included a column where other phenotypes could be specified. In cases where the phenotype was not documented, we only included age of onset and gender, and labeled the phenotype as “unknown.” We did not request identifying if the FMD was paroxysmal.

### Inclusion criteria in published and unpublished datasets

Harmonizing unpublished data with published cases required careful consideration of the inclusion criteria. Using a minimal dataset of 3 variables aided with this, at least two of which were assumed to be extremely reliable and unlikely to vary whether published or not (gender and

age at onset). Harmonizing phenotype required parameters be given for unpublished data (categories above) which we assumed would have otherwise been grouped according to presentation and diagnosed using the same clinical criteria, and also not likely to change. The categories used were derived from phenotypes described in the published literature in a further effort to harmonize the data. Specifying an “unknown” category allowed including unpublished cases without a recorded phenotype which may not be published otherwise as a result. This was in keeping with the primary outcome of the study which was to assess the distribution of gender and age at onset.

Exclusion criteria were applied at the study level for published data, and at the patient level for the unpublished data. To maximize the yield of reliable, published FMD cases we restricted the search as described in the search strategy in the main manuscript. For unpublished cases, the exclusion criteria were specified to try to align the cases as much as possible with the published dataset to ensure as “pure” an FMD sample as possible.

### **Avoiding duplicate data**

The invitation to participate in the study contained a bibliography of the results of our systematic review and hand-search. This enabled authors to ensure that their data were not already included. Upon sharing, all contributors were asked to confirm if their data were published, and if so, to provide the citation of the paper, enabling cross referencing with our database. Two study investigators independently conducted the search and the results were then cross-referenced and reviewed by two other investigators.

## **SUPPLEMENTARY RESULTS**

### **Systematic review and data selection**

The systematic review is presented in Supplementary Figure 1. The PubMed search yielded 3083 papers. After removing reviews, non-English papers, and papers not related to functional neurological disorder, 136 papers underwent full-text screening for eligibility. Papers were then removed if they were not related to FMD, they lacked the requisite quantitative FMD patient data, or there was comorbid neurological disease. After reference list searching, 98 sources continued to the data selection process. The results from the systematic review were compared to a secondary hand search by a separate author, which yielded 166 eligible records; 27 duplicates were removed. Each abstract was reviewed by 2-3 authors, and each full-text article was reviewed by two authors. Data extraction was conducted by two authors, and one author reviewed the data for accuracy.

The geographic distribution of the entire dataset is presented in the map in Supplementary Figure 2 and numerically by country in Supplementary Figure 5.

The entire dataset of all 4905 cases is presented in Supplementary Table 1, divided by phenotype and age. A significant association between age and phenotype was not seen, apart from a trend to significance for older age in gait disorders ( $p=0.054$ ).

**Published data characteristics**

Supplementary Table 2 contains a summary of the published data sources. In addition to the main FMD phenotype categories, the following entries were included in the “Other” category: blepharospasm, chewing dystonia, coma, ophthalmologic FMD, palatal myoclonus, paroxysmal ballism, stereotypies, tics (6), toe movements, and tongue movements.

**Unpublished data characteristics**

Unpublished data were shared from 33 separate groups from 28 countries (Supplementary Table 3). The response rate for data sharing was estimated at 65%. In addition to the main FMD phenotype categories, 61 cases of alternate phenotypes were reported under the “Other” category (Supplementary Table 4).

## References

1. Fahn S, Williams DT. Psychogenic dystonia. *Adv Neurol*. 1988;50:431–55.
2. Gupta A, Lang AE. Psychogenic movement disorders: *Curr Opin Neurol*. 2009 Aug;22(4):430–6.
3. Baizabal-Carvalho JF, Jankovic J. Psychogenic Ophthalmologic Movement Disorders. *J Neuropsychiatry Clin Neurosci*. 2016 Jul;28(3):195–8.
4. Hop JW, Frijns CJM, van Gijn J. Psychogenic pseudoptosis. *J Neurol*. 1997 Oct 27;244(10):623–4.
5. Stamelou M, Saifee TA, Edwards MJ, Bhatia KP. Psychogenic palatal tremor may be underrecognized: reappraisal of a large series of cases. *Mov Disord* 2012 Aug;27(9):1164–8.
6. Janik P, Milanowski L, Szejko N. Psychogenic tics: clinical characteristics and prevalence. *Psychiatr Pol*. 2014 Aug;48(4):835–45.
7. Espay AJ, Maloney T, Vannest J et al. Impaired emotion processing in functional (psychogenic) tremor: A functional magnetic resonance imaging study. *NeuroImage Clin*. 2017; 17:179–87.
8. Espay AJ, Edwards MJ, Oggioni GD et al. Tremor retraining as therapeutic strategy in psychogenic (functional) tremor. *Parkinsonism Relat Disord*. 2014 Jun;20(6):647–50.
9. Lang AE. Psychogenic dystonia: a review of 18 cases. *Can J Neurol Sci* 1995 May;22(2):136–43.

10. Tinazzi M, Fasano A, Peretti A et al. Tactile and proprioceptive temporal discrimination are impaired in functional tremor. *PloS One*. 2014;9(7):e102328.
11. Gaig C, Martí MJ, Tolosa E et al. 123I-Ioflupane SPECT in the diagnosis of suspected psychogenic Parkinsonism. *Mov Disord*. 2006;21(11):1994–8.
12. Demartini B, Ricciardi L, Parees I, Ganos C, Bhatia KP, Edwards MJ. A positive diagnosis of functional (psychogenic) tics. *Eur J Neurol*. 2014 22(3):527-e36.
13. Quartarone A, Rizzo V, Terranova C et al. Abnormal sensorimotor plasticity in organic but not in psychogenic dystonia. *Brain J Neurol*. 2009 Oct;132(Pt 10):2871–7.
14. Morgante F, Edwards MJ, Espay AJ et al. Diagnostic agreement in patients with psychogenic movement disorders. *Mov Disord* 2012 Apr;27(4):548–52.
15. Deuschl G, Köster B, Lücking CH, Scheidt C. Diagnostic and pathophysiological aspects of psychogenic tremors. *Mov Disord*. 1998 Mar;13(2):294–302.
16. Pareés I, Kassavetis P, Saifee TA et al. Failure of explicit movement control in patients with functional motor symptoms. *Mov Disord*. 2013 28(4):517–23.
17. Schwingenschuh P, Katschnig P, Seiler S et al. Moving toward “laboratory-supported” criteria for psychogenic tremor. *Mov Disord* 2011 Dec;26(14):2509–15.
18. Factor SA, Podskalny GD, Molho ES. Psychogenic movement disorders: frequency, clinical profile, and characteristics. *J Neurol Neurosurg Psychiatry*. 1995 59(4):406–12.

19. Hinson VK, Weinstein S, Bernard B, Leurgans SE, Goetz CG. Single-blind clinical trial of psychotherapy for treatment of psychogenic movement disorders. *Parkinsonism Relat Disord.* 2006 Apr;12(3):177–80.
20. Baizabal-Carvalho JF, Jankovic J. The clinical features of psychogenic movement disorders resembling tics. *J Neurol Neurosurg Psychiatry.* 2013;85(5):573–5.
21. Dallochio C, Arbasino C, Klersy C, Marchioni E. The effects of physical activity on psychogenic movement disorders. *Mov Disord.* 2010;25(4):421–5.
22. Schrag AE, Mehta AR, Bhatia KP et al. The functional neuroimaging correlates of psychogenic versus organic dystonia. *Brain J Neurol.* 2013; 136(Pt 3):770–81.
23. Schrag A, Trimble M, Quinn N, Bhatia K. The syndrome of fixed dystonia: an evaluation of 103 patients. *Brain.* 2004 Oct 1;127(10):2360–72.
24. Hassa T, de Jel E, Tuescher O, Schmidt R, Schoenfeld MA. Functional networks of motor inhibition in conversion disorder patients and feigning subjects. *NeuroImage Clin.* 2016 May 17;11:719–27.
25. Epstein SA, Maurer CW, LaFaver K, Ameli R, Sinclair S, Hallett M. Insights into Chronic Functional Movement Disorders: The Value of Qualitative Psychiatric Interviews. *Psychosomatics.* 2016;57(6):566–75.
26. Batla A, Pareés I, Edwards MJ, Stamelou M, Bhatia KP, Panicker JN. Lower urinary tract dysfunction in patients with functional movement disorders. *J Neurol Sci.* 2016 Feb;361:192–4.

27. Frasca Polara G, Fleury V, Stone J et al. Prevalence of functional (psychogenic) parkinsonism in two Swiss movement disorders clinics and review of the literature. *J Neurol Sci*. 2018 Apr;387:37–45.
28. Stone J, Hoeritzauer I, Brown K, Carson A. Therapeutic sedation for functional (psychogenic) neurological symptoms. *J Psychosom Res*. 2014 Feb;76(2):165–8.
29. McWhirter L, Ludwig L, Carson A, McIntosh RD, Stone J. Transcranial magnetic stimulation as a treatment for functional (psychogenic) upper limb weakness. *J Psychosom Res*. 2016 Oct;89:102–6.
30. Stone J, Warlow C, Sharpe M. The symptom of functional weakness: a controlled study of 107 patients. *Brain*. 2010 Apr 15;133(5):1537–51.
31. Stone J, Hoeritzauer I, Tesolin L, Carson A. Functional movement disorders of the face: A historical review and case series. *J Neurol Sci*. 2018 Dec;395:35–40.
32. Binzer M, Andersen PM, Kullgren G. Clinical characteristics of patients with motor disability due to conversion disorder: a prospective control group study. *J Neurol Neurosurg Psychiatry*. 1997 Jul;63(1):83–8.
33. Stone J, Gelauff J, Carson A. A “twist in the tale”: Altered perception of ankle position in psychogenic dystonia. *Mov Disord*. 2011 Dec 15;27(4):585–6.
34. Liepert J, Hassa T, Tüscher O, Schmidt R. Abnormal motor excitability in patients with psychogenic paresis. *J Neurol*. 2009 Jan;256(1):121–6.

35. Zeuner KE, Shoge RO, Goldstein SR, Dambrosia JM, Hallett M. Accelerometry to distinguish psychogenic from essential or parkinsonian tremor. *Neurology*. 2003 Aug 25;61(4):548–50.
36. Kranick SM, Moore JW, Yusuf N et al. Action-effect binding is decreased in motor conversion disorder: implications for sense of agency. *Mov Disord* 2013 Jul;28(8):1110–6.
37. Felicio AC, Godeiro-Junior C, Moriyama TS et al. Degenerative parkinsonism in patients with psychogenic parkinsonism: A dopamine transporter imaging study. *Clin Neurol Neurosurg*. 2010 May;112(4):282–5.
38. Stone J, Zeman A, Simonotto E et al. fMRI in Patients With Motor Conversion Symptoms and Controls With Simulated Weakness. *Psychosom Med*. 2007 Nov;69(9):961–9.
39. Aybek S, Nicholson TRJ, Draganski B et al. Grey matter changes in motor conversion disorder. *J Neurol Neurosurg Psychiatry*. 2012 Dec 12;85(2):236–8.
40. Roelofs K, de Bruijn ERA, Van Galen GP. Hyperactive action monitoring during motor-initiation in conversion paralysis: An event-related potential study. *Biol Psychol*. 2006 Mar;71(3):316–25.
41. Delange F, Roelofs K, Toni I. Increased self-monitoring during imagined movements in conversion paralysis. *Neuropsychologia*. 2007;45(9):2051–8.
42. Merello M, Ballesteros D, Rossi M et al. Lack of maintenance of gait pattern as measured by instrumental methods suggests psychogenic gait. *Funct Neurol*. 2012 Dec;27(4):217–24.



43. Liepert J, Hassa T, Tüscher O, Schmidt R. Motor excitability during movement imagination and movement observation in psychogenic lower limb paresis. *J Psychosom Res.* 2011 Jan;70(1):59–65.
44. Roelofs K, van Galen GP, Keijsers GPJ, Hoogduin CAL. Motor initiation and execution in patients with conversion paralysis. *Acta Psychol (Amst).* 2002 May;110(1):21–34.
45. Canavese C, Ciano C, Zibordi F, Zorzi G, Cavallera V, Nardocci N. Phenomenology of psychogenic movement disorders in children. *Mov Disord.* 2012;27(9):1153–7.
46. Bentivoglio AR, Loi M, Valente EM, Ialongo T, Tonali P, Albanese A. Phenotypic variability of DYT1-PTD: Does the clinical spectrum include psychogenic dystonia? *Mov Disord.* 2002 Sep;17(5):1058–63.
47. Terada K, Ikeda A, Van Ness PC et al. Presence of Bereitschaftspotential preceding psychogenic myoclonus: clinical application of jerk-locked back averaging. *J Neurol Neurosurg Psychiatry.* 1995 Jun;58(6):745–7.
48. Schwingenschuh P, Pont-Sunyer C, Surtees R, Edwards MJ, Bhatia KP. Psychogenic movement disorders in children: A report of 15 cases and a review of the literature. *Mov Disord.* 2008;23(13):1882–8.
49. Benaderette S, Fregonara PZ, Apartis E et al. Psychogenic parkinsonism: A combination of clinical, electrophysiological, and [123I]-FP-CIT SPECT scan explorations improves diagnostic accuracy. *Mov Disord.* 2005 Oct 6;21(3):310–7.

50. Piboolnurak P, Rothey N, Ahmed A et al. Psychogenic tremor disorders identified using tree-based statistical algorithms and quantitative tremor analysis. *Mov Disord*. 2005 Aug 9;20(12):1543–9.
51. Moene FC, Hoogduin KAL, Dyck RV. The inpatient treatment of patients suffering from (motor) conversion symptoms: A description of eight cases. *Int J Clin Exp Hypn*. 1998 Apr;46(2):171–90.
52. Garcin B, Roze E, Mesrati F et al. Transcranial magnetic stimulation as an efficient treatment for psychogenic movement disorders. *J Neurol Neurosurg Psychiatry*. 2013 Feb 5;84(9):1043–6.
53. Raethjen J, Kopper F, Govindan RB, Volkmann J, Deuschl G. Two different pathogenetic mechanisms in psychogenic tremor. *Neurology*. 2004 Sep 13;63(5):812–5.
54. Sojka P, Lošák J, Lamoš M et al. Processing of Emotions in Functional Movement Disorder: An Exploratory fMRI Study. *Front Neurol*. 2019 Aug 14;10:861–861.
55. Shahar E, Ravid S, Hafner H, Chistyakov A, Shcif A. Diagnostic value of Hoover sign and motor-evoked potentials in acute somatoform unilateral weakness and sensory impairment mimicking vascular stroke. *J Clin Neurosci*. 2012 Jul;19(7):980–3.
56. Søggaard U, Mathiesen BB, Simonsen E. Personality and Psychopathology in Patients With Mixed Sensory-Motor Functional Neurological Disorder (Conversion Disorder). *J Nerv Ment Dis*. 2019 Jul;207(7):546–54.

57. Biran I, Shahar-Levy Y. Patients with motor conversion disorder use early developmental motor patterns. *J Bodyw Mov Ther.* 2018 Apr;22(2):366–73.
58. Blakemore RL, Hyland BI, Hammond-Tooke GD, Anson JG. Distinct modulation of event-related potentials during motor preparation in patients with motor conversion disorder. *PLoS One.* 2013 Apr 23;8(4):e62539–e62539.
59. Ahmed MAS, Martinez A, Yee A, Cahill D, Besag FMC. Psychogenic and organic movement disorders in children. *Dev Med Child Neurol.* 2008 Apr;50(4):300–4.
60. DALE RC, SINGH H, TROEDSON C, PILLAI S, GAIKIWARI S, KOZLOWSKA K. A prospective study of acute movement disorders in children. *Dev Med Child Neurol.* 2010 Feb 12;52(8):739–48.
61. Hayes MW, Graham S, Heldorf P, de Moore G, Morris JGL. A video review of the diagnosis of psychogenic gait: Appendix and commentary. *Mov Disord.* 1999 Nov;14(6):914–21.
62. Lader M, Sartorius N. Anxiety in patients with hysterical conversion symptoms. *J Neurol Neurosurg Psychiatry.* 1968 Oct;31(5):490–5.
63. Majumdar A, López-Casas J, Poo P et al. Syndrome of fixed dystonia in adolescents – Short term outcome in 4 cases. *Eur J Paediatr Neurol.* 2009 Sep;13(5):466–72.
64. Yazici KM, Kostakoglu L. Cerebral blood flow changes in patients with conversion disorder. *Psychiatry Res Neuroimaging.* 1998 Sep;83(3):163–8.
65. Speed J. Behavioral management of conversion disorder: Retrospective study. *Arch Phys Med Rehabil.* 1996 Feb;77(2):147–54.

66. Thomson AP, Sills JA. Diagnosis of functional illness presenting with gait disorder. *Arch Dis Child*. 1988 Feb;63(2):148–53.
67. Blinder D, Rotenberg L, Taicher S. Conversion disorder after maxillofacial trauma and surgery. *Int J Oral Maxillofac Surg*. 1996 Apr;25(2):116–8.
68. Defazio G, Pastore A, Pellicciari R et al. Personality disorders and somatization in functional and organic movement disorders. *Psychiatry Res*. 2017 Nov 1;257:227–9.
69. Pellicciari R, Superbo M, Gigante AF, Livrea P, Defazio G. Disease modeling in functional movement disorders. *Parkinsonism Relat Disord*. 2014 Nov 1;20(11):1287–9.
70. Pandey S, Nahab F, Aldred J, Nutt J, Hallett M. Post-traumatic shoulder movement disorders: A challenging differential diagnosis between organic and functional. *Mov Disord Clin Pract*. 2014 Jun 1;1(2):102–5.
71. Pandey S, Koul A. Psychogenic Movement Disorders in Adults and Children: A Clinical and Video Profile of 58 Indian Patients. *Mov Disord Clin Pract*. 2017 Jul 18;4(5):763–7.
72. Chouksey A, Pandey S. Functional Movement Disorders in Elderly. *Tremor Hyperkinetic Mov* 2019;9. <https://www.ncbi.nlm.nih.gov/pmc/articles/PMC6691911/>
73. Baizabal-Carvallo JF, Jankovic J. Gender Differences in Functional Movement Disorders. *Mov Disord Clin Pract*. 2019 Dec 24;7(2):182–7.
74. Ahmad O, Ahmad KE. Functional neurological disorders in outpatient practice: An Australian cohort. *J Clin Neurosci*. 2016 Jun 1;28:93–6.

75. Gendre T, Carle G, Mesrati F et al. Quality of life in functional movement disorders is as altered as in organic movement disorders. *J Psychosom Res.* 2019;116:10–6.
76. Garcin B, Mesrati F, Hubsch C et al. Impact of Transcranial Magnetic Stimulation on Functional Movement Disorders: Cortical Modulation or a Behavioral Effect? *Front Neurol* 2017; 8. <https://www.ncbi.nlm.nih.gov/pmc/articles/PMC5515822/>
77. Stins JF, Kempe CA, Hagensmaars MA, Beek PJ, Roelofs K. Attention and postural control in patients with conversion paresis. *J Psychosom Res.* 2015 Mar;78(3):249–54.
78. McKeon A, Ahlskog JE, Bower JH, Josephs KA, Matsumoto JY. Psychogenic tremor: Long term prognosis in patients with electrophysiologically-confirmed disease. *Mov Disord.* 2008 Oct 2;24(1):72–6.
79. de Gusmão CM, Guerriero RM, Bernson-Leung ME et al. Functional Neurological Symptom Disorders in a Pediatric Emergency Room: Diagnostic Accuracy, Features, and Outcome. *Pediatr Neurol.* 2014 Aug;51(2):233–8.
80. Guerriero RM, Pier DB, de Gusmão CM et al. Increased Pediatric Functional Neurological Symptom Disorders After the Boston Marathon Bombings: A Case Series. *Pediatr Neurol.* 2014 Nov 1;51(5):619–23.

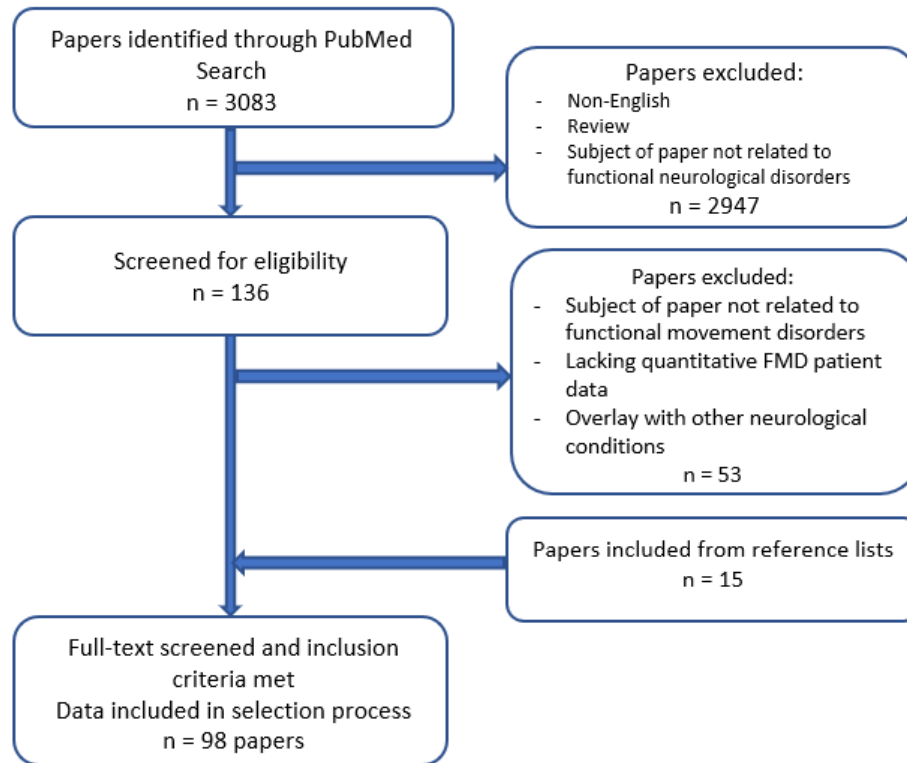

**Supplementary Figure 1:** Systematic review flow diagram. FMD, functional movement disorder.

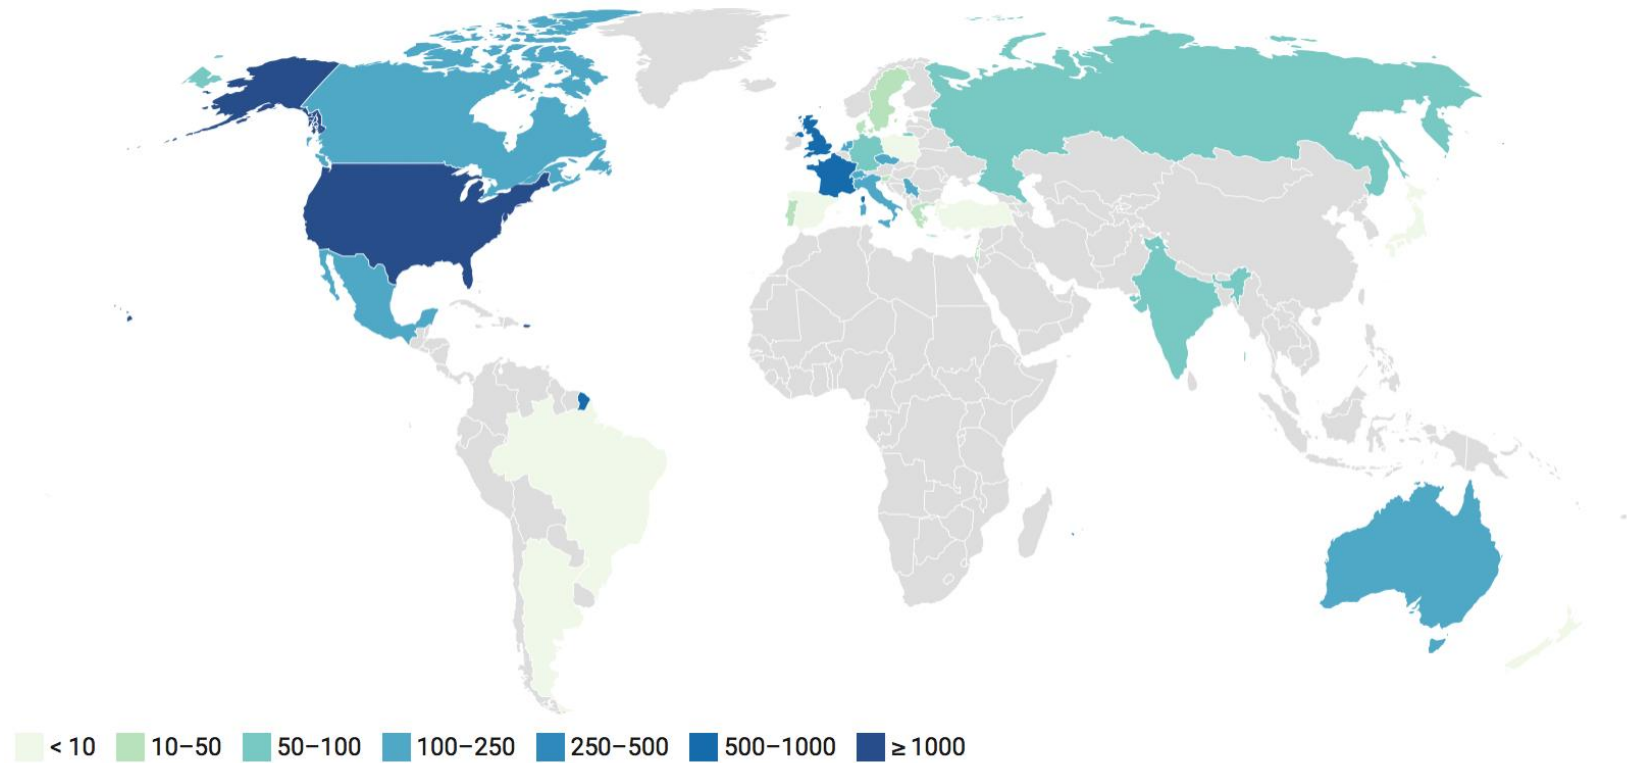

**Supplementary Figure 2:** Geographical distribution of the total dataset, published and unpublished cases.

**Supplementary Table 1:** Numbers (n(%)) of cases by phenotype in the whole sample, pediatric (16 and under), and older adults (60

|                      | Whole sample   |                | Age 16 or under onset |            |           | Age 60 or over onset |            |            | p-value* |
|----------------------|----------------|----------------|-----------------------|------------|-----------|----------------------|------------|------------|----------|
|                      | Women          | Men            | Women                 | Men        | Overall   | Women                | Men        | Overall    |          |
| Mixed                | 848 (75.2)     | 279 (24.8)     | 51 (77.3)             | 15 (22.7)  | 66 (17.2) | 105 (67.3)           | 51 (32.7)  | 156 (29.7) | 0.151    |
| Tremor               | 752 (71.2)     | 304 (28.8)     | 64 (71.1)             | 26 (28.9)  | 90 (23.5) | 93 (72.1)            | 36 (27.9)  | 129 (24.5) | 0.880    |
| Weakness             | 647 (72.9)     | 240 (27.1)     | 39 (67.2)             | 19 (32.8)  | 58 (15.1) | 22 (68.8)            | 10 (31.2)  | 32 (6.1)   | 1.0      |
| Dystonia             | 453 (78.4)     | 125 (21.6)     | 58 (78.4)             | 16 (21.6)  | 74 (19.3) | 18 (62.1)            | 11 (37.9)  | 29 (5.5)   | 0.134    |
| Gait                 | 284 (70.1)     | 121 (29.9)     | 26 (78.8)             | 7 (21.2)   | 33 (8.6)  | 48 (59.3)            | 33 (40.7)  | 81 (15.4)  | 0.054    |
| Jerks /<br>myoclonus | 142 (63.7)     | 81 (36.3)      | 14 (63.6)             | 8 (36.4)   | 22 (5.7)  | 25 (71.4)            | 10 (28.6)  | 35 (6.7)   | 0.570    |
| Parkinsonism         | 43 (51.8)      | 40 (48.2)      | -                     | 2 (100.0)  | 2 (0.5)   | 9 (90.0)             | 1 (10.0)   | 10 (1.9)   | -        |
| Facial<br>symptoms   | 56 (83.6)      | 11 (16.4)      | 1 (100.0)             | -          | 1 (0.3)   | 1 (50.0)             | 1 (50.0)   | 2 (0.4)    | -        |
| Other /<br>unknown   | 333 (69.5)     | 146 (30.5)     | 22 (59.5)             | 15 (40.5)  | 37 (9.7)  | 37 (71.2)            | 15 (28.8)  | 52 (9.9)   | 0.265    |
| <b>Total</b>         | 3558<br>(72.5) | 1347<br>(27.5) | 275 (71.8)            | 108 (28.2) | 383 (7.8) | 358 (68.1)           | 168 (31.9) | 526 (10.7) | -        |

and over).

\*Fisher's exact test within phenotypes to assess association between gender and young onset ( $\leq 16$ ) vs older onset ( $\geq 60$ )



**Supplementary Table 2:** Summary of published dataset

| Country       | Cases (n) | Reference                                                                                                                                                                                                              |
|---------------|-----------|------------------------------------------------------------------------------------------------------------------------------------------------------------------------------------------------------------------------|
| United States | 27        | Espay AJ, Maloney T, Vannest J, et al. Impaired emotion processing in functional (psychogenic) tremor: A functional magnetic resonance imaging study. <i>Neuroimage Clin.</i> 2017;17:179–187 (7)                      |
| United States | 10        | Espay AJ, Edwards MJ, Oggioni GD, et al. Tremor retraining as therapeutic strategy in psychogenic (functional) tremor. <i>Parkinsonism Relat Disord.</i> 2014;20(6):647–650 (8)                                        |
| Canada        | 18        | Lang, A. (1995). Psychogenic Dystonia: A Review of 18 Cases. <i>Canadian Journal of Neurological Sciences / Journal Canadien Des Sciences Neurologiques</i> , 22(2), 136-143.(9)                                       |
| Italy         | 11        | Tinazzi M, Fasano A, Peretti A, Bove F, Conte A, Dall'Occhio C, et al. (2014) Tactile and Proprioceptive Temporal Discrimination Are Impaired in Functional Tremor. <i>PLoS ONE</i> 9(7): e102328.(10)                 |
| Spain         | 8         | Gaig C, Martí MJ, Tolosa E, Valldeoriola F, Paredes P, Lomeña FJ, et al. 123I-Ioflupane SPECT in the diagnosis of suspected psychogenic Parkinsonism. <i>Mov Disord.</i> 2006;21(11):1994–8.(11)                       |
| England       | 11        | Demartini B, Ricciardi L, Parees I, Ganos C, Bhatia KP, Edwards MJ. A positive diagnosis of functional (psychogenic) tics. <i>Eur J Neurol.</i> 2015 Mar;22(3):527-e36.(12)                                            |
| England       | 10        | Quartarone A, Rizzo V, Terranova C, Morgante F, Schneider S, Ibrahim N, et al. Abnormal sensorimotor plasticity in organic but not in psychogenic dystonia. <i>Brain.</i> 2009 Oct 1;132(10):2871–7.(13)               |
| Italy         | 14        | Morgante F, Edwards MJ, Espay AJ, Fasano A, Mir P, Martino D. Diagnostic agreement in patients with psychogenic movement disorders. <i>Mov Disord.</i> 2012;27(4):548–52.(14)                                          |
| Germany       | 25        | Deuschl G, Köster B, Lücking CH, Scheidt C. Diagnostic and pathophysiological aspects of psychogenic tremors. <i>Mov Disord.</i> 1998;13(2):294–302.(15)                                                               |
| England       | 11        | Pareés I, Kassaveti P, Saifee TA, Sadnicka A, Davare M, Bhatia KP, et al. Failure of explicit movement control in patients with functional motor symptoms. <i>Mov Disord.</i> 2013;28(4):517–23.(16)                   |
| England       | 13        | Schwingenschuh P, Katschnig P, Seiler S, Saifee TA, Aguirregomez M, Cordivari C, et al. Moving toward “laboratory-supported” criteria for psychogenic tremor. <i>Mov Disord.</i> 2011;26(14):2509–15.(17)              |
| United States | 28        | Factor SA, Podskalny GD, Molho ES. Psychogenic movement disorders: frequency, clinical profile, and characteristics. <i>J Neurol Neurosurg Psychiatry.</i> 1995 Oct;59(4):406–12.(18)                                  |
| United States | 9         | Hinson VK, Weinstein S, Bernard B, Leurgans SE, Goetz CG. Single-blind clinical trial of psychotherapy for treatment of psychogenic movement disorders. <i>Parkinsonism Relat Disord.</i> 2006 Apr 1;12(3):177–80.(19) |

|               |     |                                                                                                                                                                                                                                                             |
|---------------|-----|-------------------------------------------------------------------------------------------------------------------------------------------------------------------------------------------------------------------------------------------------------------|
| United States | 9   | Baizabal-Carvallo JF, Jankovic J. The clinical features of psychogenic movement disorders resembling tics. <i>J Neurol Neurosurg Psychiatry</i> . 2014 May 1;85(5):573–5.(20)                                                                               |
| Italy         | 16  | Dalocchio C, Arbasino C, Klersy C, Marchioni E. The effects of physical activity on psychogenic movement disorders. <i>Mov Disord</i> . 2010;25(4):421–5.(21)                                                                                               |
| England       | 6   | Schrag AE, Mehta AR, Bhatia KP, Brown RJ, Frackowiak RSJ, Trimble MR, et al. The functional neuroimaging correlates of psychogenic versus organic dystonia. <i>Brain</i> . 2013 Mar 1;136(3):770–81.(22)                                                    |
| England       | 37  | Schrag A, Trimble M, Quinn N, Bhatia K. The syndrome of fixed dystonia: an evaluation of 103 patients. <i>Brain</i> . 2004 Oct 1;127(10):2360–72.(23)                                                                                                       |
| Germany       | 13  | Hassa T, de Jel E, Tuescher O, Schmidt R, Schoenfeld MA. Functional networks of motor inhibition in conversion disorder patients and feigning subjects. <i>NeuroImage Clin</i> . 2016;11:719–27.(24)                                                        |
| United States | 36  | Epstein SA, Maurer CW, LaFaver K, Ameli R, Sinclair S, Hallett M. Insights into Chronic Functional Movement Disorders: The Value of Qualitative Psychiatric Interviews. <i>Psychosomatics</i> . 2016 Dec;57(6):566–75.(25)                                  |
| England       | 5   | Batla A, Pareés I, Edwards MJ, Stamelou M, Bhatia KP, Panicker JN. Lower urinary tract dysfunction in patients with functional movement disorders. <i>J Neurol Sci</i> . 2016 Feb 15;361:192–4.(26)                                                         |
| Switzerland   | 12  | Frasca Polara G, Fleury V, Stone J, Barbey A, Burkhard PR, Vingerhoets F, et al. Prevalence of functional (psychogenic) parkinsonism in two Swiss movement disorders clinics and review of the literature. <i>J Neurol Sci</i> . 2018 Apr 15;387:37–45.(27) |
| United States | 11  | Baizabal-Carvallo JF, Jankovic J. Psychogenic Ophthalmologic Movement Disorders. <i>J Neuropsychiatry Clin Neurosci</i> . 2016 Jan 21;28(3):195–8.(3)                                                                                                       |
| Scotland      | 11  | Stone J, Hoeritzauer I, Brown K, Carson A. Therapeutic sedation for functional (psychogenic) neurological symptoms. <i>J Psychosom Res</i> . 2014 Feb 1;76(2):165–8.(28)                                                                                    |
| Scotland      | 10  | McWhirter L, Ludwig L, Carson A, McIntosh RD, Stone J. Transcranial magnetic stimulation as a treatment for functional (psychogenic) upper limb weakness. <i>J Psychosom Res</i> . 2016 Oct 1;89:102–6.(29)                                                 |
| Scotland      | 107 | Stone J, Warlow C, Sharpe M. The symptom of functional weakness: a controlled study of 107 patients, <i>Brain</i> 133 (5), May 2010, Pages 1537–1551.(30)                                                                                                   |
| Scotland      | 41  | Stone, J, Hoeritzauer I, Tesolin, L, Carson, A. (2018). Functional movement disorders of the face: A historical review and case series. <i>Journal of the Neurological Sciences</i> . 395-40 (31)                                                           |
| Sweden        | 30  | Binzer M, Andersen PM, Kullgren G. Clinical characteristics of patients with motor disability due to conversion disorder: a prospective control group study. <i>J Neurol Neurosurg Psychiatry</i> . 1997;63(1):83–88.(32)                                   |
| Scotland      | 7   | Stone J, Gelauff J, Carson A. A “twist in the tale”: Altered perception of ankle position in psychogenic dystonia. <i>Mov Disord</i> . 2012;27(4):585–6.(33)                                                                                                |
| Germany       | 8   | Liepert J, Hassa T, Tüscher O, Schmidt R. Abnormal motor excitability in patients with psychogenic paresis. <i>J Neurol</i> . 2009 Jan 1;256(1):121–6.(34)                                                                                                  |

|               |    |                                                                                                                                                                                                                                                               |
|---------------|----|---------------------------------------------------------------------------------------------------------------------------------------------------------------------------------------------------------------------------------------------------------------|
| United States | 6  | Zeuner KE, Shoge RO, Goldstein SR, Dambrosia JM, Hallett M. Accelerometry to distinguish psychogenic from essential or parkinsonian tremor. <i>Neurology</i> . 2003 Aug 26;61(4):548–50.(35)                                                                  |
| United States | 20 | Kranick SM, Moore JW, Yusuf N, Martinez VT, LaFaver K, Edwards MJ, et al. Action-effect binding is decreased in motor conversion disorder: implications for sense of agency. <i>Mov Disord Off J Mov Disord Soc</i> . 2013 Jul;28(8):1110–6.(36)              |
| Brazil        | 3  | Felicio AC, Godeiro-Junior C, Moriyama TS, Shih MC, Hoexter MQ, Borges V, et al. Degenerative parkinsonism in patients with psychogenic parkinsonism: A dopamine transporter imaging study. <i>Clin Neurol Neurosurg</i> . 2010 May 1;112(4):282–5.(37)       |
| Scotland      | 4  | Stone J, Zeman A, Simonotto E, Meyer M, Azuma R, Flett S, et al. fMRI in Patients With Motor Conversion Symptoms and Controls With Simulated Weakness. <i>Psychosom Med</i> . 2007 Dec;69(9):961–9.(38)                                                       |
| England       | 15 | Aybek S, Nicholson TRJ, Draganski B, Daly E, Murphy DG, David AS, et al. Grey matter changes in motor conversion disorder. <i>J Neurol Neurosurg Psychiatry</i> . 2014 Feb 1;85(2):236–8.(39)                                                                 |
| Netherlands   | 6  | Roelofs K, de Bruijn ERA, Van Galen GP. Hyperactive action monitoring during motor-initiation in conversion paralysis: An event-related potential study. <i>Biol Psychol</i> . 2006 Mar;71(3):316–25.(40)                                                     |
| Netherlands   | 8  | Delange F, Roelofs K, Toni I. Increased self-monitoring during imagined movements in conversion paralysis. <i>Neuropsychologia</i> . 2007;45(9):2051–8.(41)                                                                                                   |
| Argentina     | 5  | Merello M, Ballesteros D, Rossi M, Arena J, Crespo M, Cervio A, et al. Lack of maintenance of gait pattern as measured by instrumental methods suggests psychogenic gait. <i>Funct Neurol</i> . 2012 Dec;27(4):217–24.(42)                                    |
| Germany       | 12 | Liepert J, Hassa T, Tüscher O, Schmidt R. Motor excitability during movement imagination and movement observation in psychogenic lower limb paresis. <i>J Psychosom Res</i> . 2011 Jan 1;70(1):59–65.(43)                                                     |
| Netherlands   | 4  | Roelofs K, van Galen GP, Keijsers GPJ, Hoogduin CAL. Motor initiation and execution in patients with conversion paralysis. <i>Acta Psychol (Amst)</i> . 2002 May;110(1):21–34.(44)                                                                            |
| Italy         | 14 | Canavese C, Ciano C, Zibordi F, Zorzi G, Cavallera V, Nardocci N. Phenomenology of psychogenic movement disorders in children. <i>Mov Disord Off J Mov Disord Soc</i> . 2012 Aug;27(9):1153–7.(45)                                                            |
| Italy         | 1  | Bentivoglio AR, Loi M, Valente EM, Ialongo T, Tonali P, Albanese A. Phenotypic variability of DYT1-PTD: Does the clinical spectrum include psychogenic dystonia? <i>Mov Disord</i> . 2002;17(5):1058–63.(46)                                                  |
| Japan         | 6  | Terada K, Ikeda A, Van Ness PC, Nagamine T, Kaji R, Kimura J, et al. Presence of Bereitschaftspotential preceding psychogenic myoclonus: clinical application of jerk-locked back averaging. <i>J Neurol Neurosurg Psychiatry</i> . 1995 Jun;58(6):745–7.(47) |
| England       | 15 | Schwingenschuh P, Pont-Sunyer C, Surtees R, Edwards MJ, Bhatia KP. Psychogenic movement disorders in children: A report of 15 cases and a review of the literature. <i>Mov Disord</i> . 2008;23(13):1882–8.(48)                                               |

|                |    |                                                                                                                                                                                                                                                                                |
|----------------|----|--------------------------------------------------------------------------------------------------------------------------------------------------------------------------------------------------------------------------------------------------------------------------------|
| England        | 7  | Stamelou M, Saifee TA, Edwards MJ, Bhatia KP. Psychogenic palatal tremor may be underrecognized: reappraisal of a large series of cases. <i>Mov Disord Off J Mov Disord Soc.</i> 2012 Aug;27(9):1164–8.(5)                                                                     |
| France         | 3  | Benaderette S, Fregonara PZ, Apartis E, Nguyen C, Trocello J-M, Remy P, et al. Psychogenic parkinsonism: A combination of clinical, electrophysiological, and [123I]-FP-CIT SPECT scan explorations improves diagnostic accuracy. <i>Mov Disord.</i> 2006;21(3):310–7.(49)     |
| United States  | 23 | Piboolnurak P, Rothey N, Ahmed A, Ford B, Yu Q, Xu D, et al. Psychogenic tremor disorders identified using tree-based statistical algorithms and quantitative tremor analysis. <i>Mov Disord.</i> 2005;20(12):1543–9.(50)                                                      |
| Netherlands    | 3  | Moene FC, Hoogduin KAL, Dyck RV. The inpatient treatment of patients suffering from (motor) conversion symptoms: A description of eight cases. <i>Int J Clin Exp Hypn.</i> 1998 Apr;46(2):171–90.(51)                                                                          |
| France         | 24 | Garcin B, Roze E, Mesrati F, Cognat E, Fournier E, Vidailhet M, et al. Transcranial magnetic stimulation as an efficient treatment for psychogenic movement disorders. <i>J Neurol Neurosurg Psychiatry.</i> 2013 Sep 1;84(9):1043–6.(52)                                      |
| Germany        | 15 | Raethjen J, Kopper F, Govindan RB, Volkmann J, Deuschl G. Two different pathogenetic mechanisms in psychogenic tremor. <i>Neurology.</i> 2004 Sep 14;(63):812–5.(53)                                                                                                           |
| Czech Republic | 15 | Sojka P, Losak, J, Lamoš, M et al. (2019). Processing of Emotions in Functional Movement Disorder: An Exploratory fMRI Study. <i>Frontiers in Neurology.</i> 10. 861-861 (54)                                                                                                  |
| Israel         | 3  | Shahar, E., Ravid, S., Hafner, H., Chistyakov, A., & Shcif, A. (2012). Diagnostic value of Hoover sign and motor-evoked potentials in acute somatoform unilateral weakness and sensory impairment mimicking vascular stroke. <i>J Clin Neurosci.</i> 2012 Jul;19(7):980–3.(55) |
| Denmark        | 13 | Søgaard U et al. (2019). Personality and Psychopathology in Patients With Mixed Sensory-Motor Functional Neurological Disorder (Conversion Disorder) A Pilot Study. <i>Journal of Nervous and Mental Disease.</i> 207 (7) 546-554. (56)                                        |
| Israel         | 6  | Biran, I., & Shahar-Levy, Y. (2018). Patients with motor conversion disorder use early developmental motor patterns. <i>Journal of Bodywork and Movement Therapies.</i> 22(2), 366–373.(57)                                                                                    |
| New Zealand    | 6  | Blakemore, R. L., Hyland, B. I., Hammond-Tooke, G. D., & Anson, J. G. (2013). Distinct Modulation of Event-Related Potentials during Motor Preparation in Patients with Motor Conversion Disorder. <i>PLoS ONE.</i> 8(4), 1–8.(58)                                             |
| England        | 5  | Ahmed, M. A., Martinez, A., Yee, A., Cahill, D., & Besag, F. M. (2008). Psychogenic and organic movement disorders in children. <i>Dev.Med.Child Neurol Apr;</i> 50(4):300–4. (59)                                                                                             |
| Australia      | 12 | Dale, R. C., Singh, H., Troedson, C., Pillai, S., Gaikiwari, S., & Kozłowska, K. (2010). A prospective study of acute movement disorders in children. <i>Dev.Med.Child Neurol.</i> , Feb 12;52(8):739–48. (60)                                                                 |

|               |     |                                                                                                                                                                                                                                                                                                                                                                                                                |
|---------------|-----|----------------------------------------------------------------------------------------------------------------------------------------------------------------------------------------------------------------------------------------------------------------------------------------------------------------------------------------------------------------------------------------------------------------|
| Australia     | 12  | Hayes, M. W., Graham, S., Heldorf, P., De Moore, G., Morris, J. G. L., De, M. G., & Morris, J. G. L. (1999). A video review of the diagnosis of psychogenic gait: appendix and commentary. <i>Mov Disord.</i> , 14(6) 914–921.(61)                                                                                                                                                                             |
| England       | 7   | Lader, M., & Sartorius, N. (1968). Anxiety in patients with hysterical conversion symptoms. <i>J.Neurol.Neurosurg.Psychiatry</i> , 31(5), 490–495.(62)                                                                                                                                                                                                                                                         |
| England       | 4   | Majumdar, A., López-Casas, J., Poo, P., et al. (2009). Syndrome of fixed dystonia in adolescents-short term outcome in 4 cases. <i>European Journal of Paediatric Neurology : EJPN : Official Journal of the European Paediatric Neurology Society</i> , 13(5), 466–472.(63)                                                                                                                                   |
| Turkey        | 5   | Yazici, K. M., & Kostakoglu, L. (1998). Cerebral blood flow changes in patients with conversion disorder. <i>Psychiatry Res.</i> , 83(3) 163–168.(64)                                                                                                                                                                                                                                                          |
| England       | 8   | Speed, J. (1996). Behavioral management of conversion disorder: retrospective study. <i>Archives of Physical Medicine and Rehabilitation</i> , 77(2), 147–154.(65)                                                                                                                                                                                                                                             |
| England       | 9   | Thomson, A. P., & Sills, J. A. (1988). Diagnosis of functional illness presenting with gait disorder. <i>Archives of Disease in Childhood</i> , 63(2), 148–153.(66)                                                                                                                                                                                                                                            |
| Israel        | 1   | Blinder, D., Rotenberg, L., & Taicher, S. (1996). Conversion disorder after maxillofacial trauma and surgery. <i>International Journal of Oral &amp; Maxillofacial Surgery</i> , 25(2), 116–118.(67)                                                                                                                                                                                                           |
| Poland        | 5   | Janik, P., Milanowski, L., & Szejko, N. (2014). Psychogenic tics: Clinical characteristics and prevalence. <i>Psychiatria Polska</i> , 48(4), 835–845.(6)                                                                                                                                                                                                                                                      |
| Netherlands   | 3   | Hop, J. W., Frijns, C. J. M., & van Gijn, J. (1997). Psychogenic pseudoptosis. <i>Journal of Neurology</i> , 244(10), 623–624.(4)                                                                                                                                                                                                                                                                              |
| Italy         | 35  | Defazio G, Pastore A, Pellicciari R, Pierri G, Gigante AF, Fabio G, Superbo M, Margari F. Personality disorders and somatization in functional and organic movement disorders. <i>Psychiatry Res.</i> 2017 Nov;257:227-229.(68)<br>Pellicciari R, Superbo M, Gigante AF, Livrea P, Defazio G. Disease modeling in functional movement disorders. <i>Parkinsonism Relat Disord.</i> 2014 Nov;20(11):1287-9.(69) |
| United States | 3   | Pandey, S., Nahab, F., Aldred, J., Nutt, J. and Hallett, M. (2014), Post-Traumatic Shoulder Movement Disorders: A Challenging Differential Diagnosis Between Organic and Functional. <i>Mov Disord Clin Pract</i> , 1: 102-105.(70)                                                                                                                                                                            |
| India         | 58  | Pandey S, Koul A. Psychogenic Movement Disorders in Adults and Children: A Clinical and Video Profile of 58 Indian Patients. <i>Mov Disord Clin Pract.</i> 2017;4(5):763–767.(71)                                                                                                                                                                                                                              |
| India         | 18  | Chouksey A, Pandey S. Functional Movement Disorders in Elderly. <i>Tremor Other Hyperkinet Mov (N Y)</i> . 2019;9:(72)                                                                                                                                                                                                                                                                                         |
| Mexico        | 196 | Baizabal-Carvalho, J.F. and Jankovic, J. (2019), Gender Differences in Functional Movement Disorders. <i>Mov Disord Clin Pract.</i> 7(2) 182-187.(73)                                                                                                                                                                                                                                                          |
| Australia     | 66  | Ahmad O, Ahmad KE. Functional neurological disorders in outpatient practice: An Australian cohort. <i>J Clin Neurosci.</i> 2016 Jun;28:93-6. (74)                                                                                                                                                                                                                                                              |
| France        | 51  | Gendre T, Carle G, Mesrati F, Hubsch C, Mauras T, Roze E, Houot M, Degos B, Garcin B. Quality of life in functional movement disorders is as altered as in organic movement disorders. <i>J Psychosom Res.</i> 2019 Jan;116:10-16.(75)                                                                                                                                                                         |

|               |             |                                                                                                                                                                                                                                                                                     |
|---------------|-------------|-------------------------------------------------------------------------------------------------------------------------------------------------------------------------------------------------------------------------------------------------------------------------------------|
| France        | 33          | Garcin B, Mesrati F, Hubsch C, Mauras T, Iliescu I, Naccache L, Vidailhet M, Roze E, Degos B. Impact of Transcranial Magnetic Stimulation on Functional Movement Disorders: Cortical Modulation or a Behavioral Effect? <i>Front Neurol.</i> 2017 Jul 19;8:338.(76)                 |
| Netherlands   | 9           | Stins, J.F., Kempe, C.A. (Lianne), Hagens, M.A., Beek, P.J., & Roelofs, K. (2015). Attention and postural control in patients with conversion paresis. <i>Journal of Psychosomatic Research</i> , 78, 249-254.(77)                                                                  |
| United States | 65          | McKeon A, Ahlskog JE, Bower JH, Josephs KA, Matsumoto JY. Psychogenic tremor: long-term prognosis in patients with electrophysiologically confirmed disease. <i>Mov Disord.</i> 2009 Jan 15;24(1):72-6.(78)                                                                         |
| United States | 30          | de Gusmão CM, Guerriero RM, Bernson-Leung ME, Pier D, Ibeziako PI, Bujoreanu S, Maski KP, Urion DK, Waugh JL. Functional neurological symptom disorders in a pediatric emergency room: diagnostic accuracy, features, and outcome. <i>Pediatr Neurol.</i> 2014 Aug;51(2):233-8.(79) |
| United States | 6           | Guerriero RM, Pier DB, de Gusmão CM, Bernson-Leung ME, Maski KP, Urion DK, Waugh JL. Increased pediatric functional neurological symptom disorders after the Boston marathon bombings: a case series. <i>Pediatr Neurol.</i> 2014 Nov;51(5):619-23.(80)                             |
| Canada        | 14          | Lang AE, Koller WC, Fahn S. Psychogenic Parkinsonism. <i>Archives of Neurology.</i> 1995;52(8):802-810.                                                                                                                                                                             |
| Poland        | 2           | Sławek J, Wichowicz HM, Cubała WJ, et al. Psychogenic axial myoclonus: report on two cases. <i>Neurol Sci.</i> 2010;31(2):219-222.                                                                                                                                                  |
| <b>Total</b>  | <b>1448</b> |                                                                                                                                                                                                                                                                                     |

**Supplementary Table 3:** Summary of unpublished dataset

| <b>Institution</b>                        | <b>City</b> | <b># of cases</b> |
|-------------------------------------------|-------------|-------------------|
| Northwestern University                   | Chicago     | 94                |
| Toronto Western Hospital                  | Toronto     | 84                |
| University Clinical Centre Ljubljana      | Slovenia    | 23                |
| St Georges University of London           | London      | 200               |
| University of Colorado                    | Aurora      | 356               |
| Massachusetts General Hospital            | Boston      | 98                |
| Emory University                          | Atlanta     | 50                |
| Stony Brook University                    | Stony Brook | 45                |
| University of Guanajuato                  | Leon        | 15                |
| University of Melbourne                   | Heidelberg  | 120               |
| Università degli Studi di Milano          | Milano      | 31                |
| Research Center of Neurology              | Moscow      | 34                |
| Hospital de Santa Maria                   | Lisbon      | 17                |
| Charles University                        | Prague      | 206               |
| University of Texas                       | Houston     | 67                |
| Inselspital, Switzerland                  | Bern        | 140               |
| University of California, Los Angeles     | Los Angeles | 44                |
| IRCCS Fondazione Don Carlo Gnocchi Onlus  | Milano      | 12                |
| University of Belgrade                    | Serbia      | 102               |
| Rush University                           | Chicago     | 236               |
| University of Porto                       | Porto       | 11                |
| Hygeia Hospital                           | Athens      | 20                |
| University of Cincinnati                  | Cincinnati  | 164               |
| University of Verona                      | Verona      | 24                |
| Loginov Moscow Clinical Scientific Center | Moscow      | 28                |
| Sechenov University                       | Moscow      | 6                 |
| Mayo Clinic                               | Rochester   | 48                |
| IRCCS Humanitas Research Hospital         | Milano      | 17                |
| University of Cincinnati                  | Cincinnati  | 455               |
| University of Groningen                   | Groningen   | 186               |
| National Institute of Health              | Bethesda    | 75                |
| King's College London                     | London      | 45                |
| Le Salpêtrière hospital                   | Paris       | 404               |
| <b>Total</b>                              |             | <b>3457</b>       |

**Supplementary Table 4:** Alternate phenotypes of unpublished Functional Movement Disorders included in “Other” category

| <b>FMD phenotype</b>                                         | <b>Cases (n)</b> |
|--------------------------------------------------------------|------------------|
| Chorea                                                       | 13               |
| Tics                                                         | 9                |
| Speech                                                       | 8                |
| Dyskinesia                                                   | 4                |
| Benign fasciculations                                        | 3                |
| Paroxysmal FMD                                               | 3                |
| Shaking                                                      | 3                |
| Stiffness                                                    | 3                |
| Oculomotor                                                   | 2                |
| Palatal tremor                                               | 2                |
| Spasticity                                                   | 2                |
| Abduction/adduction of legs while seated                     | 1                |
| Arms will point to one side and legs will "kick out"         | 1                |
| Burping/retching - abdominal wall and pharyngeal involvement | 1                |
| Dysphagia                                                    | 1                |
| Blepharospasm                                                | 1                |
| Hiccups                                                      | 1                |
| 'Keyboard-type' movements in hands and feet                  | 1                |
| Orolingual dyskinesias                                       | 1                |
| Trunk and neck stereotypies                                  | 1                |
| <b>Total</b>                                                 | <b>61</b>        |



**Supplementary Table 5:** Geographic distribution of the total sample

|                    |             |
|--------------------|-------------|
| Argentina          | 5           |
| Australia          | 210         |
| Brazil             | 3           |
| Canada             | 116         |
| Czech Republic     | 221         |
| Denmark            | 13          |
| England            | 408         |
| France             | 515         |
| Germany            | 73          |
| Greece             | 20          |
| India              | 76          |
| Israel             | 10          |
| Italy              | 175         |
| Japan              | 6           |
| Mexico             | 196         |
| Netherlands        | 219         |
| New Zealand        | 6           |
| Poland             | 7           |
| Portugal           | 28          |
| Russia             | 68          |
| Scotland           | 180         |
| Serbia             | 102         |
| Slovenia           | 23          |
| Spain              | 8           |
| Sweden             | 30          |
| Switzerland        | 152         |
| Turkey             | 5           |
| United States      | 2030        |
| <b>Total cases</b> | <b>4905</b> |
